# Supplementary material for: A Pilot Study of Using Smartphone Application vs. Routine Follow-Up for Patient Care in Advanced Non-Small Cell Lung Cancer During the COVID-19 Pandemic Era
Source: PubMed Central journal article supplement (PMC9253575; doi:10.3389/fmedt.2022.900172), 2022-06-21
Supplement: Data_Sheet_1.pdf [file Data_Sheet_1.pdf]

## Supplementary Online Content

### Electronic infrastructure

Our medical application developers built this application with features and functionality regarding HIPAA-compliant healthcare application development using NetBeans 8.2, which is a java integrated development environments (IDE) for writing the application on a mobile phone. The NetBeans platform provides a modular fashion, well developed windowing system, a service provider application programming interface and persistence mechanism, thereby promoting excellent programming practices.

A Lung Cancer Care application was designed to be simple, user-friendly with clear font, and large buttons for an android operating system. Enrolled patients could submit their information at any point, when desired. If any of the answers in the questionnaires met the severity thresholds previously determined, the patient would be able to contact their healthcare provider team promptly with a direct link by phone call or line application. A dashboard was created to display summaries of each patient's reports. The healthcare provider team was instructed to review and respond concerning their symptom reports within a few days depending on their severity, e.g., contacted patient, needed to go to the ER, no follow-up needed. Enrolled patients were monitored between visits via a smartphone application downloaded onto their personal device. The program contained in Lung Cancer Care application was managed to comply with data protection requirement and security standard (21 CFR part 11). All enrolled patient information was secured using encryption on the mobile device, in which android devices consisted of the Android 128-bit AES (GCM). All information stored on the smartphone application and transferred between systems was protected using secure transmission protocols and HIPAA-compliant databases. All communication between the application and other systems used HTTPS.

NetBeans IDE enabled configuring options for its many areas of functionality as well as customizing its workspace using option window. The option windows were enabled to set general IDE settings and edit any of the IDE's configurable settings. Moreover, inherent support was available for testing NetBeans platform application within the NetBeans platform's built-in harness scripts. Thus, functional and unit tests were supported out of the box. The simplification of testing infrastructure was referred to as "simpletests", which simplifies the setup of mandatory work.

## Supplementary Online Content 1

### Example of 11 PRO questions showing the real web-based interface

|                                                                                                                                                                                                                                                                                                                                                                                                                    |                                                                                                                                                                                                                                                                                                                                       |                                                                                                                                                                                                                                                                                                                                              |
|--------------------------------------------------------------------------------------------------------------------------------------------------------------------------------------------------------------------------------------------------------------------------------------------------------------------------------------------------------------------------------------------------------------------|---------------------------------------------------------------------------------------------------------------------------------------------------------------------------------------------------------------------------------------------------------------------------------------------------------------------------------------|----------------------------------------------------------------------------------------------------------------------------------------------------------------------------------------------------------------------------------------------------------------------------------------------------------------------------------------------|
| <p><b>Question no.1: Fatigability</b></p> <hr/> <p>ในช่วง 1 สัปดาห์ที่ผ่านมา ท่านรู้สึก ร่างกายสดชื่นหรืออ่อนเพลียระดับใด</p> <hr/> <ul style="list-style-type: none"> <li>▶ ไม่อ่อนเพลีย สดชื่นมาก</li> <li>▶ อ่อนเพลียน้อย</li> <li>▶ ปานกลาง</li> <li>▶ มาก</li> </ul> <p>ย้อนกลับ</p> <p>ปิด</p>                                                                                                               | <p><b>Question no.2: Appetite</b></p> <hr/> <p>ระดับความรู้สึกอยากอาหารในช่วง 1 สัปดาห์ที่ผ่านมา</p> <hr/> <ul style="list-style-type: none"> <li>▶ รับประทานได้ปกติ</li> <li>▶ รับประทานได้ใกล้เคียงเดิม</li> <li>▶ รับประทานได้ประมาณ 1/2 ของปกติ</li> <li>▶ รับประทานได้น้อย</li> </ul> <p>ย้อนกลับ</p> <p>ปิด</p>                 | <p><b>Question no.3: Cough</b></p> <hr/> <p>อาการไอในช่วง 1 สัปดาห์ที่ผ่านมา</p> <hr/> <ul style="list-style-type: none"> <li>▶ ไม่ไอเลย</li> <li>▶ โอน้อย</li> <li>▶ ไอปานกลางรบกวนชีวิตประจำวัน</li> <li>▶ ไอมากมีเลือดปน หรือ ไอจนเหนื่อย</li> </ul> <p>ย้อนกลับ</p> <p>ปิด</p>                                                           |
| <p><b>Question no.4: Dyspnea</b></p> <hr/> <p>อาการเหนื่อย หายใจ เร็ว หายใจไม่ อิ่ม ในช่วง 1 สัปดาห์ที่ผ่านมา</p> <hr/> <ul style="list-style-type: none"> <li>▶ ไม่เหนื่อย</li> <li>▶ เหนื่อยเล็กน้อยยังทำงานออกแรงเบาๆ เช่น กวาดบ้าน ตูบ้าน รดน้ำต้นไม้ ล้างจานได้</li> <li>▶ เหนื่อยปานกลาง พอทำได้แค่กิจวัตรประจำวัน</li> <li>▶ เหนื่อยมากต้องนั่งพักหรือนอนเป็นส่วนใหญ่</li> </ul> <p>ย้อนกลับ</p> <p>ปิด</p> | <p><b>Question no.5: Pain</b></p> <hr/> <p>ในช่วง 1 สัปดาห์ที่ผ่านมา อาการ ปวดในร่างกายเช่น ปวดหลัง เจ็บ หน้าอก ปวดท้อง เป็นต้น ท่านให้ ระดับความปวดเท่าใด โดยคะแนน เต็ม 10 คะแนนคือปวดมากที่สุด 0</p> <ul style="list-style-type: none"> <li>▶ 0</li> <li>▶ 1-3</li> <li>▶ 4-6</li> <li>▶ 7-10</li> </ul> <p>ย้อนกลับ</p> <p>ปิด</p> | <p><b>Question no.6: Diarrhea</b></p> <hr/> <p>ในช่วง 1 สัปดาห์ที่ผ่านมา ท่านถ่าย เหลวหรือไม่ (โดยเฉลี่ย)</p> <hr/> <ul style="list-style-type: none"> <li>▶ ขับถ่ายปกติ</li> <li>▶ น้อยกว่า 4 ครั้งต่อวัน</li> <li>▶ 4 - 6 ครั้งต่อวัน</li> <li>▶ 7 ครั้งขึ้นไปรุนแรงมากเช่นมีมูกเลือดปนอาการ หน้ามืด</li> </ul> <p>ย้อนกลับ</p> <p>ปิด</p> |

|                                                                                                                                                                                                                                                                                                                                                                                                                               |                                                                                                                                                                                                                                                                                                                                                                          |                                                                                                                                                                                                                                                                                                                                                                                     |
|-------------------------------------------------------------------------------------------------------------------------------------------------------------------------------------------------------------------------------------------------------------------------------------------------------------------------------------------------------------------------------------------------------------------------------|--------------------------------------------------------------------------------------------------------------------------------------------------------------------------------------------------------------------------------------------------------------------------------------------------------------------------------------------------------------------------|-------------------------------------------------------------------------------------------------------------------------------------------------------------------------------------------------------------------------------------------------------------------------------------------------------------------------------------------------------------------------------------|
| <p><b>Question no.7: Rash, Skin lesions</b></p> <hr/> <p>ท่านมีผื่นผิวหนังลักษณะคล้ายผื่นสิ่วจากยาเม็ดพุ่งเป้าหรือไม่</p> <hr/> <ul style="list-style-type: none"> <li>▶ ไม่มี หรือไม่ได้ใช้ยาพุ่งเป้า</li> <li>▶ น้อยกว่า 10% ของผิวหนังทั้งหมด</li> <li>▶ 10 - 30% ของผิวหนังทั้งหมด</li> <li>▶ มากกว่า 30% ของผิวหนังทั้งหมด</li> </ul> <p style="text-align: center;">ย้อนกลับ</p> <p style="text-align: center;">ปิด</p> | <p><b>Question no.8: Paronychia</b></p> <hr/> <p>ท่านมีเล็บขบจากยาเม็ดพุ่งเป้าหรือไม่</p> <hr/> <ul style="list-style-type: none"> <li>▶ ไม่มี หรือไม่ได้ใช้ยาพุ่งเป้า</li> <li>▶ บวมแดง</li> <li>▶ บวม แดง เจ็บ และมีหนอง ทำให้ทำกิจกรรมไม่ได้</li> <li>▶ ทำกิจกรรมไม่ได้</li> </ul> <p style="text-align: center;">ย้อนกลับ</p> <p style="text-align: center;">ปิด</p> | <p><b>Question no.9: Mucositis/oral ulcer</b></p> <hr/> <p>ท่านมีแผลในปากหรือไม่</p> <hr/> <ul style="list-style-type: none"> <li>▶ ไม่มี</li> <li>▶ มีแผลในปาก เจ็บเล็กน้อย</li> <li>▶ มีแผลในปาก เจ็บปานกลางยังรับประทานอาหารได้</li> <li>▶ มีแผลในปาก เจ็บมากรับประทานอาหารได้ลดลง</li> </ul> <p style="text-align: center;">ย้อนกลับ</p> <p style="text-align: center;">ปิด</p> |
| <p><b>Question no.10: Numbness</b></p> <hr/> <p>ท่านมีอาการชาหรือไม่</p> <hr/> <ul style="list-style-type: none"> <li>▶ ไม่ชา</li> <li>▶ ชาเล็กน้อย</li> <li>▶ ชา ยังทำกิจวัตรประจำวันได้เช่น ตัดกระดาษ เลือ หวีผม</li> <li>▶ ชา ไม่สามารถทำกิจวัตรประจำวันได้ เช่น หวีผม ตัดกระดาษ เลือ</li> </ul> <p style="text-align: center;">ย้อนกลับ</p> <p style="text-align: center;">ปิด</p>                                        | <p><b>Question no.11: Fever</b></p> <hr/> <p>ท่านมีไข้หรือไม่</p> <hr/> <ul style="list-style-type: none"> <li>▶ ไม่มี</li> <li>▶ มี</li> </ul> <p style="text-align: center;">ย้อนกลับ</p> <p style="text-align: center;">ปิด</p>                                                                                                                                       |                                                                                                                                                                                                                                                                                                                                                                                     |
